# Supplementary material for: Synthesis and In Vivo Evaluation of Insulin-Loaded Whey Beads as an Oral Peptide Delivery System
Source: MDPI journal article supplement (doi:10.3390/pharmaceutics13050656), 2021-05-04
Supplement: s1 [file s1]

# Supplementary Materials: Synthesis and In Vivo Evaluation of Insulin-Loaded Whey Beads as an Oral Peptide Delivery System

Joanne Heade, Fiona McCartney, Miguel Chenlo, Olga Moreno Marro, Maja Severic, Robert Kent, Sinead B. Bleiel, Clara V. Alvarez, Brendan T. Griffin and David J. Brayden

## S1. Release modelling

**Table S1.** The formulas used for each mathematical model of drug release. F = fraction (%) of drug released over time (t). Adapted from Zhang *et al.* [22].

| Model            | Formula                    | Parameters                                                                                                                               |
|------------------|----------------------------|------------------------------------------------------------------------------------------------------------------------------------------|
| Zero Order       | $F = k_0(t)$               | $k_0$ = zero order release constant                                                                                                      |
| First order      | $F = 100(1 - e^{-k_1(t)})$ | $k_1$ = first order release constant                                                                                                     |
| Higuchi          | $F = k_H(t^{0.5})$         | $k_H$ = Higushi release constant                                                                                                         |
| Korsmeyer-Peppas | $F = k_{KP}(t^n)$          | $k_{KP}$ = release constant incorporating structural and geometric characteristics of the drug-dosage form<br>$n$ = diffusional exponent |

**Table S2.** The  $R^2_{adj}$  and other parameters calculated for each type of release model applied to the SGF/SIF release data. Underlined and shaded values indicate the best fit.

|                  | Parameters       | + Aerosil®   | - Aerosil®    | Prototype    |
|------------------|------------------|--------------|---------------|--------------|
| Zero order       | $k_0$            | 0.345        | 0.525         | 0.606        |
|                  | $R^2_{adj}$      | 0.3885       | 0.1713        | -0.4055      |
|                  | AIC              | 62.9117      | 71.1550       | 67.3616      |
| First order      | $k_1 (min^{-1})$ | 0.006        | 0.018         | 0.050        |
|                  | $R^2_{adj}$      | 0.755        | 0.932         | <u>0.993</u> |
|                  | AIC              | 55.591       | 46.851        | 29.903       |
| Higuchi          | $k_H$            | 4.578        | 7.031         | 8.427        |
|                  | $R^2_{adj}$      | 0.8630       | 0.8309        | 0.6057       |
|                  | AIC              | 50.8879      | 58.4333       | 58.4639      |
| Korsmeyer-Peppas | $k_{KP}$         | 10.166       | 23.080        | 57.735       |
|                  | $n$              | 0.344        | 0.259         | 0.108        |
|                  | $R^2_{adj}$      | <u>0.889</u> | <u>0.9375</u> | 0.989        |
|                  | AIC              | 49.929       | 51.251        | 34.119       |

## S2. Swelling behaviour

Insulin beads were weighed and placed into a series of Eppendorf tubes (~10 mg/tube). The tubes were labelled T0, T15, T30, T60, T90, and T120. 1 mL SGF was added to one set of tubes and 1 mL SIF was added to a second set. Both sets of Eppendorf tubes were incubated on a shaker at 600 rpm at 37 °C for 2 h (Titramax 1000, Heidolph, Germany). T0 samples were immediately removed, the SGF/SIF was discarded, and the beads were placed on a paper towel before being weighed. This was repeated for all time points. The degree of swelling was calculated according to the equation below.

$$\text{Degree of Swelling (\%)} = \frac{\text{Weight at } T_x - \text{Initial weight (mg)}}{\text{Initial weight (mg)}}$$

Where Tx is the various time points, and the initial weight is the known weight of beads added to that particular tube at the start of the study. The swelling calculation for T0 samples was subtracted from the other time points to account for any surface water that was not removed by the paper towel.

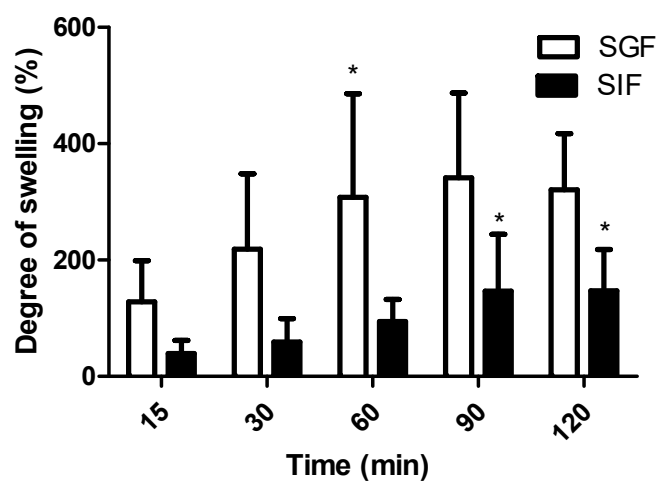

**Figure S1.** Swelling behaviour of insulin loaded beads after drying with Aerosil® followed by incubation in SGF (pH 1.2) and SIF (pH 6.8). Data are presented as mean  $\pm$  SD, \*  $p < 0.05$  compared to T0, with  $n = 3$ . The swelling was particularly evident in SGF.
